# Supplementary material
Source: Elsevier journal article supplement (https://www.sciencedirect.com/science/article/pii/S0213911117300341)
Supplement: mmc1 [file S0213911117300341:mmc1.doc]

**Apéndice**

**Parámetros de analítica web**

### *Comportamiento*

## Sesión (antes llamado “Visita”): número de visitas que recibe la web en un periodo determinado. Cada vez que un usuario visita el web se contabiliza como una visita. Por lo tanto, si un mismo usuario visita la web dos veces se contabilizará como dos visitas.

## Usuario (antes llamado “Visitante único”): número de usuarios que han visitado la web en un periodo determinado. Por lo tanto, si un mismo usuario visita la web dos veces se contabilizará, tanto si lo ha hecho el mismo día como en días diferentes, como un visitante único.

## Páginas vistas: número de páginas de la web visitada en un periodo determinado. Es decir, el número de veces que un navegador carga una página de nuestra web.

## Páginas/sesión: número de páginas visitadas en una sesión por los usuarios de la web de un periodo determinado.

## Tiempo en página: media del tiempo que los usuarios de un periodo determinado han estado en una página determinada de la web.

## Duración media de la sesión: media del tiempo que han durado las sesiones de los usuarios en un periodo determinado. Es decir, es la media del tiempo entre la hora de llegada a la web y la hora en que se visita la última página antes de cerrar el navegador de los visitantes de una web. De forma predeterminada, las sesiones se cierran después de 30 minutos de inactividad. En el caso de las aplicaciones para móviles, la sesión se cierra después de 30 segundos de inactividad o si la aplicación funciona en segundo plano.

## Tiempo medio de descarga de página: tiempo medio (en segundos) que se tarda en descargar la página.

## Porcentaje de rebote *(bounce):* porcentaje de visitantes que han entrado a la web y la abandonan sin visitar ninguna otra página, y por lo tanto sin haber realizado ninguna acción.

## Tasa de abandono: cociente entre las salidas y las páginas vistas.

## Tasa de conversión: medida que indica cuántas de nuestras visitas cumplen algunos objetivos definidos previamente por nosotros. El objetivo se define como la acción que deseamos que el usuario lleve a cabo dentro de la web (p. ej., llenar un determinado registro). La tasa de conversión es el resultado de dividir el número de visitas que realizan la acción deseada entre el número de visitas que llegan a la web.

*Audiencia*

- Idioma:muestra un ranking de las visitas recibidas por idioma, mostrando también datos de la duración y el porcentaje de nuevas visitas, entre otros.
- Ubicación:muestra un mapa con diferentes colores por países según las visitas que han hecho en la web, y una tabla donde se muestran las visitas y sus características por continentes, países y ciudades.
- Visitantes nuevos *vs*. recurrentes:muestra un gráfico del número de visitas por día, semana o mes de cada uno de los dos grupos, así como las características de cada uno de ellos.
- Frecuencia y sesiones recientes:se detalla el número de sesiones de los usuarios, así como los días transcurridos desde la última sesión.
- Interacción:muestra el número de visitas de una duración concreta (p. ej., de 0 a 10 segundos).
- Navegador:muestra el número de visitas y sus características según los navegadores utilizados por los usuarios.
- Redes:muestra el número de visitas y sus características según las redes utilizadas por los usuarios.
- Dispositivos:muestra los dispositivos desde los que los usuarios navegan por la web.

*Adquisición*

- Canales:muestra los canales que utilizan los usuarios para llegar a la web, bien sea directo (han entrado en la web tecleando la URL en la barra del navegador), a través de buscadores (p. ej., Google), referido a través de otra página web que tiene un enlace a nuestra web o a través de una red social.
- Referencias:muestra las fuentes que han remitido el tránsito a nuestra web.
- Referencias sociales:muestra la red social en la que se ha producido la actividad vinculada a nuestra web. Indica el número de sesiones originadas desde cada red social, y para cada una de ellas el número de páginas vistas, la duración mediana de cada sesión y el número de páginas por sesión.

## Parámetros de calidad de una web

## *Autoridad de optimización web*

## Ranking de página *(PageRank):* es un sistema algorítmico de ranking desarrollado y registrado por Google que mide la importancia o la relevancia de una web basándose en la cantidad y la calidad (se refiere a enlaces que provengan de webs del mismo ámbito y que sean relevantes en este ámbito) de los enlaces que derivan a la web. Se mide mediante una escala de 0 a 10, con mayor puntuación cuantos más enlaces tengas, cuanto más relevantes sean estos y cuanto más orientados estén al mismo ámbito que el de la web (p. ej., salud).

## Ranking de Alexa: es un indicador numérico que permite valorar el tráfico y la popularidad de un sitio web en el mundo y por países. El ranking se basa en la combinación del número de visitantes y de páginas vistas en cada visita en los últimos 3 meses. Cuanto más pequeño es el valor, mejor posicionada está la web.

## Ranking Moz: es una puntuación de 0 a 10 que indica la popularidad de la web, reflejando así la importancia de la web en Internet.

## Enlaces de retroceso *(Backlinks):* son enlaces provenientes de otras webs que dirigen hacia la propia web. Es importante que haya muchos enlaces entrantes y desde lugares con repercusión y relevancia para generar un mejor posicionamiento. Los enlaces externos tienen diferente peso según la web en la que están ubicados.

## Autoridad de dominio: es un indicador de calidad o credibilidad de la web (puntuación de 0 a 100) propuesto por SEOMoz.

## Directorio abierto *(Open Directory):* indica si la web está dentro del directorio DMOZ (un directorio de webs). El primer registro del dominio y la fecha de expiración del mismo también tienen influencia en la autoridad SEO. Google premia a los que compran un dominio a largo plazo, puesto que demuestran en cierto modo que el interés en el posicionamiento no es algo temporal.

## *Optimización web básica*

## Redirección www: se refiere al hecho de que, al escribir la web sin indicar “www”, Google o cualquier otro buscador reconozca la web. En caso de que no haya redirección, el buscador consideraría que se trata de dos webs diferentes, afectando así negativamente al posicionamiento.

## Título y Meta Descripción: son etiquetas con información sobre nuestra web que los buscadores escanean y tienen en consideración a la hora de mostrar los resultados de una búsqueda. El Título es recomendable que no exceda de 60 caracteres, y la Meta Descripción de los 155. Esta es la descripción del contenido de la página web mostrada en el resultado de búsqueda.

## Meta palabras clave: son etiquetas que permiten incluir palabras clave relacionadas con el contenido del sitio web. Anteriormente era un parámetro clave en el posicionamiento web, pero en la actualidad ya no es tenida en cuenta por el SEO.

## Robot.txt: este fichero es un archivo de texto que da recomendaciones e instrucciones a los buscadores sobre cómo tienen que tratar y rastrear el contenido del sitio web. Así se evita que Google crea que tenemos contenido duplicado y se reduce la sobrecarga del servidor. Se puede obtener más información sobre este fichero en http://moz.com/learn/seo/robotstxt.

## Mapa del sitio *(Sitemap):* es un archivo en el que se enumeran las páginas de una web, creando un mapa de la organización del contenido de la web que permite que los buscadores entiendan la estructura de la web (se indican las direcciones de todas las páginas de nuestra web).

## URL limpias: una URL limpia es aquella que no tiene caracteres extraños ni variables, que es fácil de comprender por el usuario y que, idealmente, contiene palabras para el posicionamiento.

## *Contenido*

##

## Páginas indexadas: se refiere a la cantidad de contenido existente en la web que está (indexada) en la base de datos del buscador. Para indexar una página es importante facilitar a los buscadores que rastreen toda nuestra web. Esto se consigue con la inclusión de enlaces internos, evitando contenidos flash o creando un *sitemap,* entre otros.

## Imágenes: las imágenes no pueden ser reconocidas por los buscadores por sí solas. En cambio, si las imágenes están etiquetadas y descritas a través de los atributos Título(permite dar un título a la imagen) y Alt (permite hacer una descripción en texto de la imagen), los buscadores sí pueden detectarlas y esto influye positivamente en el posicionamiento de la web.

## Enlaces de la página *(On-Page):* se refiere a los enlaces existentes en la web. Estos se dividen en los que dirigen hacia nuestra propia web (internos) y los que dirigen a otras webs (externos).

## Etiquetas H: son etiquetas que indican un título y describen el contenido de la página web. Las principales etiquetas de una web son H1, H2 y H3, que se corresponden a títulos que indican el contenido de diferentes secciones, apartados o subapartados de la página web. Son fundamentales para mejorar el posicionamiento de cada enlace de la web.

## Textos resaltados: los buscadores dan preferencia al contenido destacado en negrita, cursiva o subrayado, así como al uso de *bullets*. Es importante destacar las partes más importantes del contenido para que los enlaces tengan una mejor visibilidad.

## Blog: indica si la página web tiene blog o no.

*Usabilidad*

- URL y Favicon (“Favorite Icon”):indicala URL de nuestra página y la imagen asociada a nuestra web que aparece en la barra de direcciones, favoritos o *bookmarks*.
- Página de error 404:se refiere a que cuando llegamos a un enlace que no existe, nuestra web dispone de una página personalizada que nos lo indica. Tener la página de error 404 personalizada mejora el posicionamiento de la web.
- CSS para impresión: el CSS es un lenguaje utilizado por la presentación de una web en HTML. El CSS permite obtener una versión optimizada por impresora que elimina los contenidos superfluos, modifica o elimina imágenes y colores de fondo, y optimiza los contenidos de texto para facilitar la lectura. Este indicador indica si nuestra web tiene o no una versión CSS para ser imprimida.
- Formulario de conversión: indica si en nuestra web hay algún tipo de formulario (p. ej., formulario de contacto).
- Idioma: indica si se ha especificado cuál es el idioma de nuestra web. Es importante declararlo para mejorar la accesibilidad y para que sea detectable por herramientas de autoría (se utiliza por corrección ortográfica y gramatical) y de traducción.
- Tiempo de descarga: se mide el tiempo de descarga de la web y si este es adecuado para un buen uso de nuestra página web.
- Optimización móvil:indica si la página está diseñada y preparada para ser utilizada adecuadamente en el móvil.

## *Aspectos técnicos*

## Protocolo seguro (HTTPS/SSL): indica si la web contiene protocolo de comunicación de Internet que protege la integridad y la confidencialidad de los datos de las personas usuarias entre el ordenador y el sitio web.

## Etiquetas meta: son líneas de código del HTML que indican a los buscadores por qué temas tiene que ser localizada la página web. Los buscadores consultan la información de la etiqueta de las páginas, buscando coincidencias con lo que el usuario pretende encontrar. A través de esta etiqueta pueden especificarse los atributos *name* y *content*. El atributo *name* indica el tipo de información, y el atributo *content* indica el valor de esta información.

## Ratio texto/código: uno de los valores que usan los buscadores para evaluar el contenido de una página es el porcentaje o ratio de texto (el contenido propio) en relación al total del código HTML de una web (incluye la cantidad de código que utiliza para mostrar la web).

## Validación W3C: el servicio de validación de CSS del W3C es un *software* libre creado por el W3C para ayudar a los diseñadores y desarrolladores web a validar hojas de estilo en cascada (CSS). Para colores, texto y posicionamiento HTML utiliza un lenguaje de estilo llamado CSS, acrónimo de *Cascading Style Sheets*.

## Privacidad e-mail: indica si en el código del sitio web hay correos electrónicos que puedan ser rastreados y detectados por *bots*. Los *bots* (“Robots”) son programas informáticos que pueden imitar el comportamiento humano y realizar funciones de edición o simular ser una persona.

## *Google Analytics:* indica si la web utiliza *Google Analytics* para obtener información de tráfico de datos.

## Optimización web: incluye parámetros como que la página no utilice tablas, *frames* o estilos CSS en HTML.

## Tecnologías web: indica si la web tiene *Facebook like, Twitter button, Google+, RSS, wordpress, etc.*

## Localización del servidor: ofrece datos sobre la territorialidad del dominio.

## Optimización *wordpress:* incluye varios parámetros sobre la optimización del sistema de gestión de contenidos.

## *Redes sociales*

- **Influencia social: si tiene en cuenta *Facebook likes, Facebook shares, Facebook comments, twitter backlinks, linkedin shares,* etc.**
- **Página de *Facebook:* valora el nombre, la descripción, la web, los seguidores, etc.**
- **Cuenta de *Twitter:* valora la cuenta, el nombre, los seguidores, etc.**

## Indicadores de redes sociales

*Métricas de audiencia o de comunidad*

a) Twitter

- Seguidores *(followers):*personas que siguen la cuenta de *Twitter*.
- Nuevos seguidores y dejados de seguir *(unfollowers):* los nuevos seguidores son aquellas personas que empiezan a seguir nuestra cuenta de Twitter, y los *unfollowers* son los que dejan de seguirla. Es importante contabilizar los nuevos seguidores para conocer el aumento *(Growth)* de nuestra comunidad.
- Alcance potencial *(Potential reach):*estimación de nuestra potencial audiencia en Twitter. Incluye los seguidores de las personas que nos mencionan.

b) Facebook

- Fans *(Me gusta):* un fan de la página es aquella persona que marca “Me gusta” en nuestra página.
- Nuevos fans: nuevos usuarios a los que les ha gustado la página.
- Alcance total: visitantes únicos que han visto cualquier contenido de nuestra página en los últimos 7 días.
- Alcance de la publicación: número de personas que han visto nuestra publicación en nuestra página.

*Métricas de compromiso*

a) Twitter

- Favoritos:hace referencia a las veces que nuestros *tweets* han sido marcados como favoritos (se ha presionado el icono de la estrella para indicar que ese tweet ha gustado).
- Respuestas: número de *tweets* que empiezan con nuestro nombre de usuario (@usuario) en respuesta a uno de los *tweets* que hemos publicado. Las respuestas se muestran en la pestaña de menciones de la página de notificaciones.
- Mensajes directos:número de mensajes que hemos recibido para mantener conversaciones privadas con nuestros seguidores.
- Clics en enlaces de nuestros contenidos:número de clics sobre el enlace que incluimos en nuestros *tweets*.
- Listas:número de listas creadas por temas de interés, por grupos de usuarios de *Twitter,* donde incluyen nuestro perfil de *Twitter*.

b) Facebook

- Visitas:número de personas que visitan nuestra página, por grupos de usuarios de Facebook, donde se incluye nuestro perfil de Facebook.
- Publicaciones que “gustan”:número de *posts* que “han gustado” a nuestros fans.
- Comentarios y sentimiento de los comentarios (positivo/negativo/neutro): número de comentarios de los fans en nuestro muro y valoración de estos.
- Clics en enlaces de nuestros contenidos:número de clics a los enlaces que incluimos en nuestras publicaciones.
- Mensajes privados: número de mensajes que hemos recibido, por parte de nuestros fans, para mantener conversaciones privadas.
- Impresiones:número de veces que se muestra una publicación de nuestra página, tanto si se hace clic en ella como si no. Los usuarios pueden ver varias impresiones de la misma publicación. Por ejemplo, alguien puede ver una impresión en la actualización de la página y otra impresión si un amigo suyo lo comparte.

*Métricas de viralidad*

a) Twitter

- *Tweets:*cada uno de los mensajes, de hasta 140 caracteres, que escribimos en nuestra cuenta de *Twitter*.
- *Retweets:*cada una de las veces que nuestros *tweets* son republicados por algún otro usuario de *Twitter,* conservando su atribución original. Empiezan con el acrónimo RT.
- Impresiones:las impresiones de Twitter se componen de tres elementos, que son el *tweet* original, las respuestas a ese *tweet* y los *retweets*. Analizar cada uno por separado es importante. En muchos casos puede existir un número alto de impresiones, pero son originadas por un grupo pequeño de cuentas con una alta tasa de *retweets;* esto querría decir que se tiene que hacer un esfuerzo para hacer crecer de manera artificial la conversación.
- Menciones:cualquier actualización de *Twitter* que contenga nuestro nombre de usuario (@usuario) en el cuerpo del *tweet*. Esto quiere decir que las respuestas también son consideradas menciones. Recopilamos todas las respuestas en la pestaña de “Menciones” de la página de notificaciones.
- Influencia (*Klout* o *Kred):* la puntuación *Klout* es un número entre 0 y 100 obtenido de la medida de la información (sobre unos 400 parámetros) que un usuario ha integrado en su perfil. Cuanta más alta sea la puntuación de un perfil de *Twitter,* más alta es su influencia a las redes sociales. El *Kred* ofrece dos mediciones objetivas: la influencia *(influence),* entendida como la habilidad de inspirar acciones en la comunidad a través de los *posts* (basada en una escala del 1 al 1000), y el alcance (*Outreach),* que mide las acciones del usuario hacia el contenido del resto de los usuarios.

b) Facebook

- Tasa de interacción: se refiere a las personas comprometidas con nuestras publicaciones. Se trata del porcentaje de personas a las que “les ha gustado” una publicación, la han compartido, han hecho clic en el enlace o lo han comentado en los últimos 7 días.

*Métricas de conversión*

a) Twitter y Facebook

- Número de descargas:contenido descargado a través de nuestros enlaces.
- Nuevos registros conseguidos en la web: número de nuevos registros conseguidos en nuestra web a partir de los *tweets*.
- Número de compras:número de compras conseguidas en nuestra web a partir de los *tweets*.
- *Lead:*número de usuarios, provenientes de *Twitter* o de *Facebook,* que dejan sus datos en nuestra web.

**Bibliografía y tutoriales recomendados**

MOZ. The beginners guide to SEO. (Consultado el 15/9/2015.) Disponible en: <http://moz.com/beginners-guide-to-seo>

Barcelona Activa. Cibernàrium. Iniciació a la mètrica web amb Google Analytics. (Consultado el 15/12/2014.) Disponible en: <http://w144.bcn.cat/cibernarium/images/cat/Iniciacio_a_la_metrica_web_tcm64-33017.pdf>

Google Analytics. (Consultado el 1/9/2016.) Disponible en: [https://analytics.google.com](https://analytics.google.com/)

Manual de Google Analytics v7. (Consultado el 15/12/2015.) Disponible en:

<http://www.thatzad.com/assets/pdf/manual_google_analytics.pdf>

Occam’s Razor by Avinash Kaushik. (Consultado en diciembre de 2014.) Disponible en: <http://www.kaushik.net/avinash/standard-metrics-revisited-3-bounce-rate/>

Digital Analytics Association. (Consultado en diciembre de 2014.) Disponible en: http://www.digitalanalyticsassociation.org

Olmos I. Tutorial práctico de analítica web con Google Analytics. 2013. (Consultado el 15/12/2014.) Disponible en:

[https://www.dropbox.com/s/emcgtpmcf8nrr5m/Tutorial%20Google%20Analytics_Isabel_Olmos.pdf](https://www.dropbox.com/s/emcgtpmcf8nrr5m/Tutorial Google Analytics_Isabel_Olmos.pdf)

Villa M. Tutorial Google Analytics. (Consultado el 15/12/2014.) Disponible en:

<http://www.proyectosbds.com/blog/wp-content/uploads/2013/01/tutorial-Google-Analytics.pdf>

Gabinet de Comunicació i Educació de la Universitat Autònoma de Barcelona. Les xarxes socials. Crea i gestiona les teves xarxes d’amics a Internet (en línia). Barcelona Activa. Cibernàrium. (Consultado el 15/12/2014.) Disponible en: http://w144.bcn.cat/cibernarium/cat/centre-de-recursos/pdf/X/pagina17370/usettressetzero/xarxes-socials-crea-i-gestiona-les-teves-xarxes-d-amics-a-internet.do

Barcelona Activa. Cibernàrium. Itinerari bàsic 4 Participació a la xarxa(en línia). (Consultado el 15/9/2014.) Disponible en: http://w144.bcn.cat/cibernarium/images/cat/IT4_Participacio_xarxa_nou_tcm64-34121.pdf

Núñez V. Métricas para medir la efectividad de nuestros contenidos en redes sociales. (Consultado el 15/12/2014.) Disponible en: <http://vilmanunez.com/2013/10/09/metricas-para-medir-la-efectividad-de-nuestros-contenidos-en-redes-sociales/>

MetricSpot: Web Analytics and SEO tools. (Consultado el 1/9/2016.) Disponible en: http:/www.metricspot.com

Woorank: Instant website review. (Consultado el 1/9/2016.) Disponible en: http:/www.woorank.com

Audiense: smart social intelligence. (Consultado el 1/9/2016.) Disponible en: <https://audiense.com/>

Guia de usuario de Audiense. (Consultado el 15/12/2014.) Disponible en: https://guiadeusuario.audiense.com/

# Guía: Cómo usar y optimizar Twitter Analytics. (Consultado el 15/12/2015.) Disponible en: http://www.maxcf.es/turorial-twitter-analytics/

Facebook Insights. (Consultado el 15/12/2015.) Disponible en: <http://es.slideshare.net/smblog/guia-oficial-de-facebook-insights>

Facebook: Servicio de ayuda. (Consultado el 15/12/2015.) Disponible en: <https://es-es.facebook.com/help/336893449723054/>

Tweetreach by Union Metrics. (Consultado el 1/9/2016.) Disponible en: <https://tweetreach.com/>

Hashtracking. (Consultado el 1/9/2016.) Disponible en: <https://www.hashtracking.com/>
